# Supplementary material for: Iron alters cell survival in a mitochondria-dependent pathway in ovarian cancer cells
Source: PubMed Central journal article supplement (PMC4338747; doi:10.1042/bj20140878), 2015-02-20

### **Supplementary Figure Legends**

Figure S1 A, HEY cells were seeded at 325,000 cells in each well of a 6-well plate. Following overnight adherence, cells were treated with non-targeting, TOM20, or TOM70 siRNA on two successive days as described in Experimental section. This was followed by treatment with FAC (250  $\mu$ M) for 48 hours. Cell lysates were then analyzed by western blotting using the following antibodies: (1) LC3B, (2) TOM20, (3) TOM70, and (4) GAPDH (n=2). B, HEY cells were seeded on glass coverslips in each well of a 6-well plate. Following attachment, cells were treated with non-targeting or TOM70 siRNA on two successive days. Next, the cells were treated with FAC (250  $\mu$ M) for 48 hours. Cells were then viewed using an inverted fluorescence microscope and a 60X oil immersion objective. Representative images are shown (n=4). C, Cells were treated as described in B with the addition of LysoTracker Red for 1 hour. Cells were stained with DAPI and imaged using an inverted fluorescence microscope and a 60X oil immersion objective. Representative images are shown (n=4).

Figure S2 Left panel, HEY cells were seeded at 250,000 cells in each well of a 6 well plate. Following cell adherence, cells were treated with H2DCFDA for 30 minutes prior to addition of FAC (250  $\mu$ M) or H2O2 (100  $\mu$ M). Media supernatant and adherent cells were collected following 24 hour treatment into PBS. ROS were measured via flow cytometry (n=2). Right panel, HEY cells were seeded at 250,000 cells in each well of a 6-well plate. Following adherence, cells were treated with H2DCFDA for 30 minutes prior to addition of FAC (250  $\mu$ M) alone, Ru360 (10  $\mu$ M) alone, U0126 (10  $\mu$ M) alone, Ru360 (10  $\mu$ M) in combination with FAC (250  $\mu$ M), and U0126 (10  $\mu$ M) in combination with (250  $\mu$ M). Media supernatant and adherent cells were collected following 24 hour treatment into PBS. ROS were measured via flow cytometry (n=2).

Figure S1

A

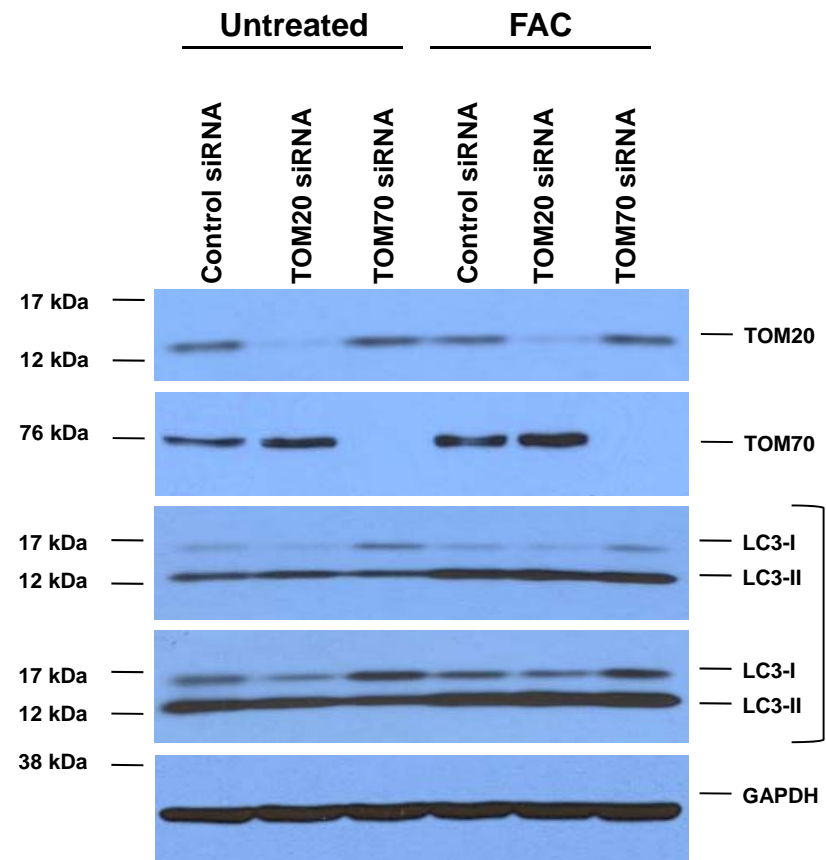

Figure S1

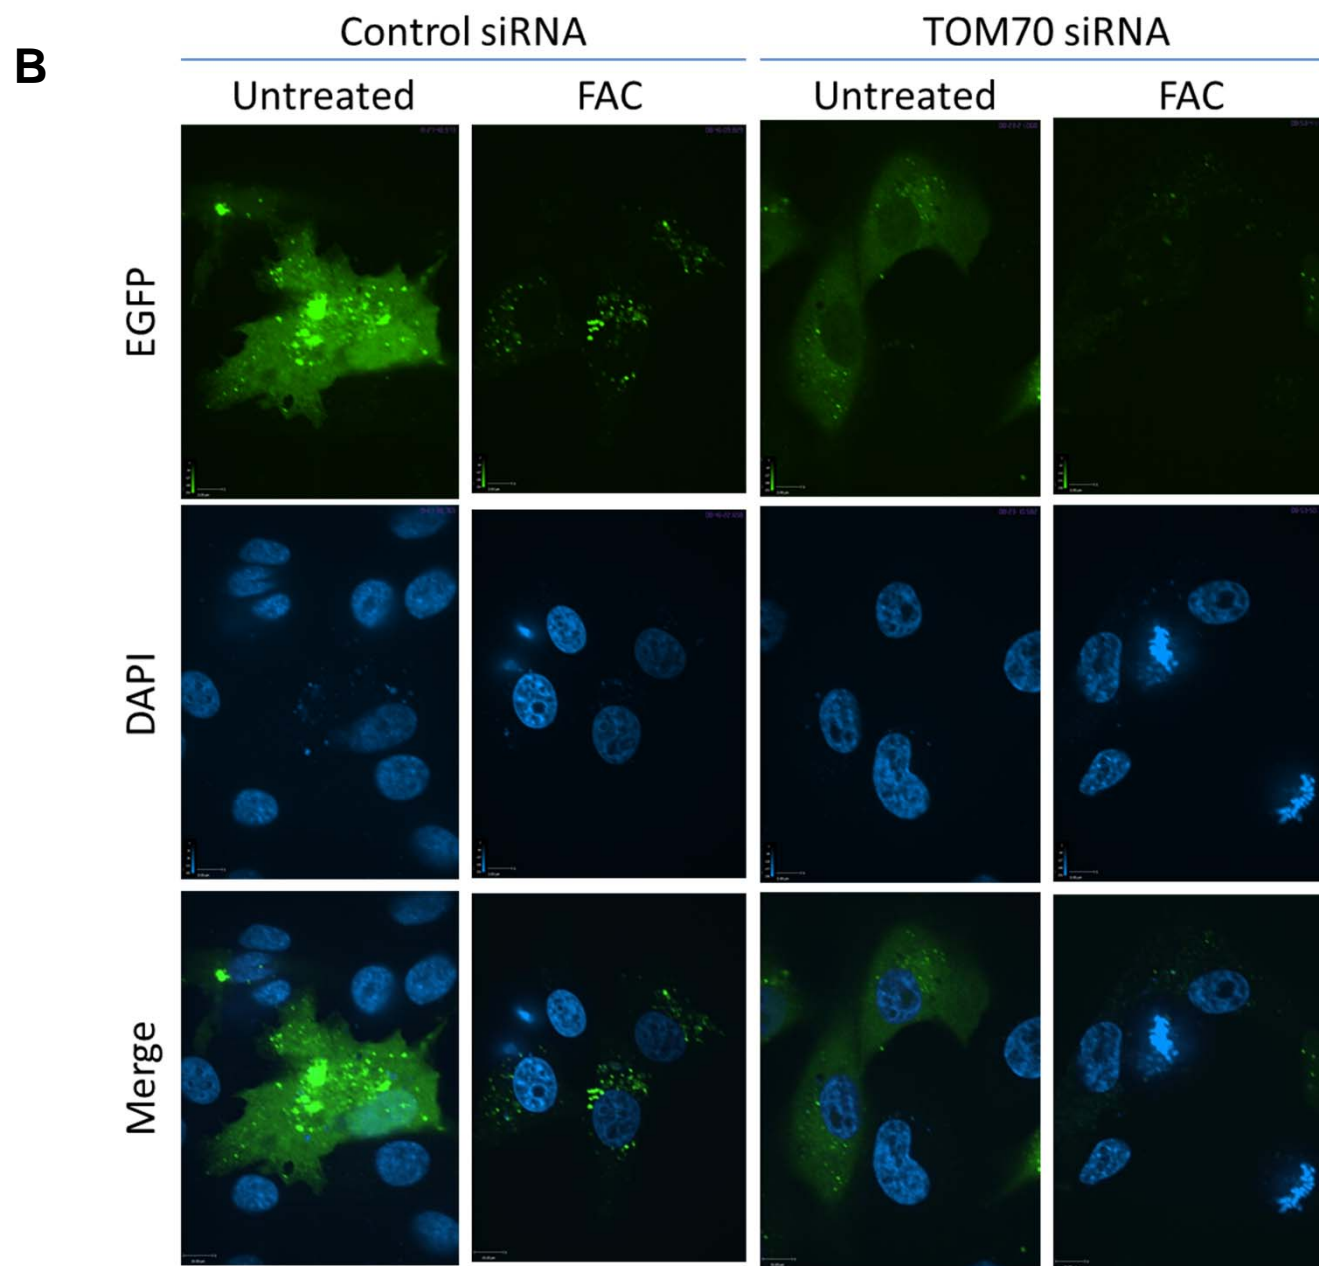

Figure S1

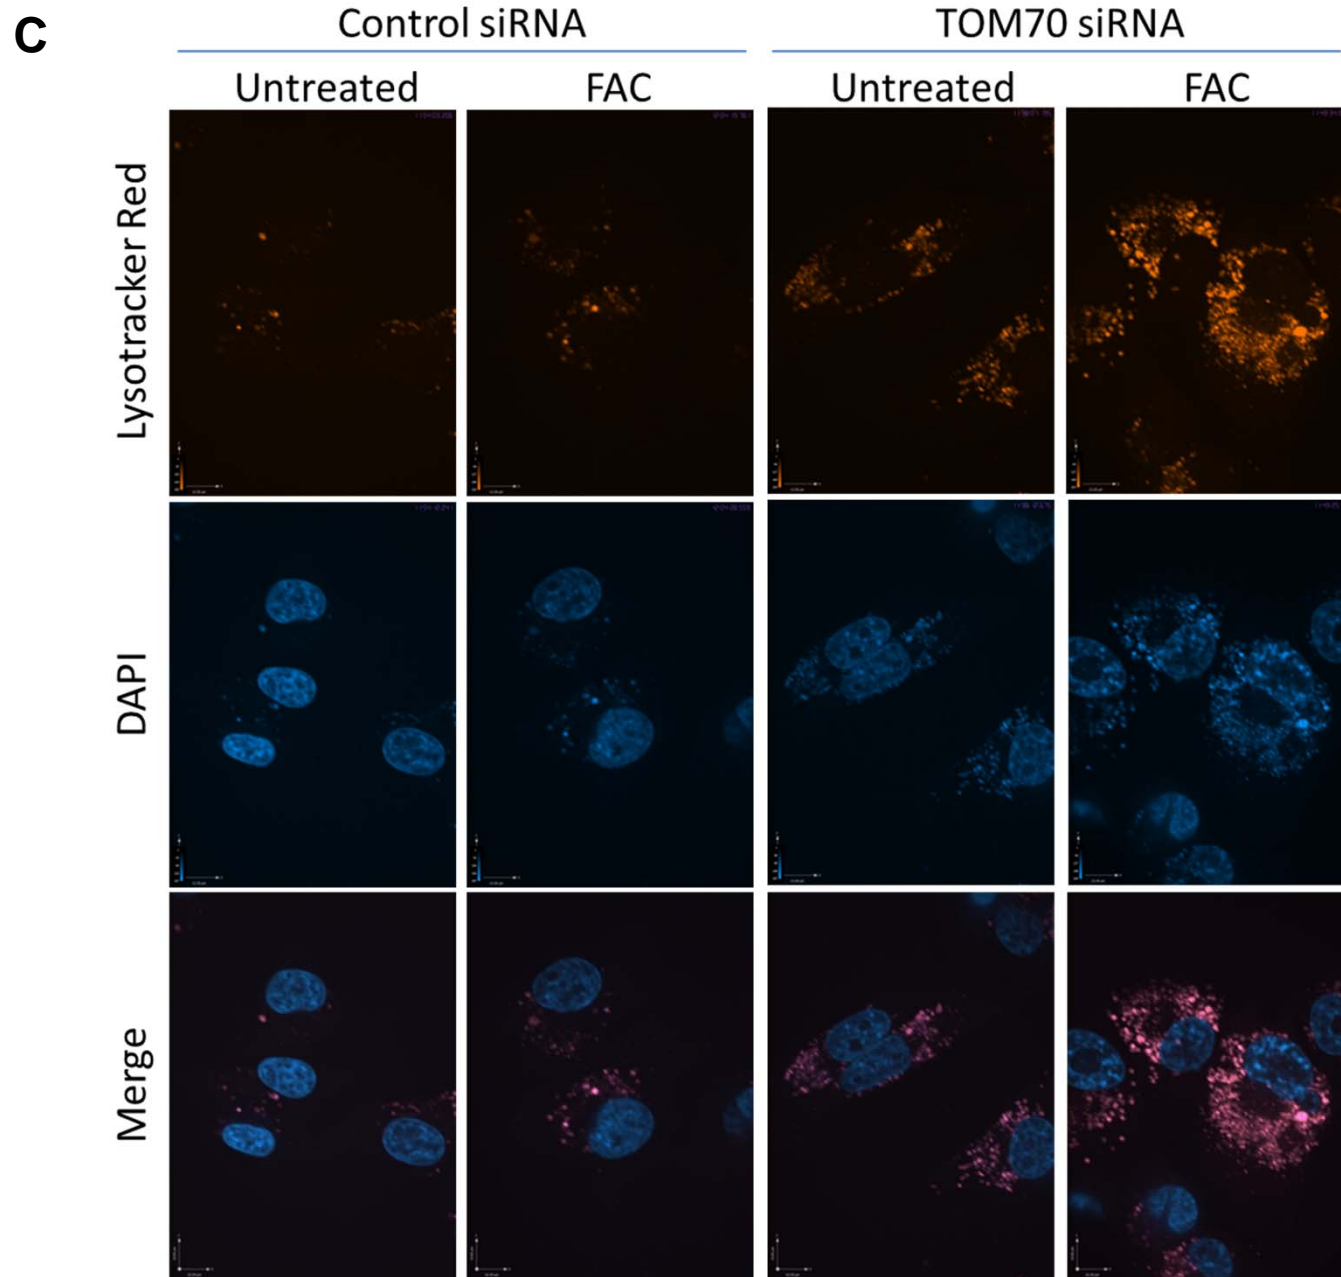

Figure S2

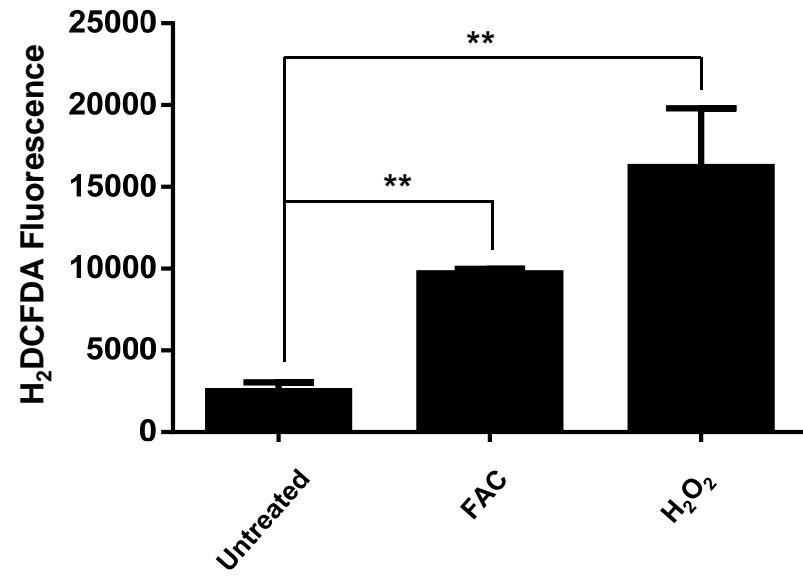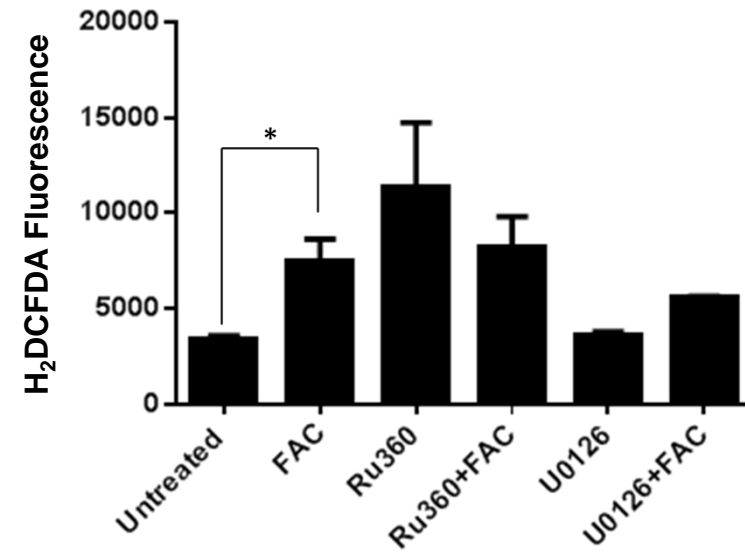

Supplement: bj4660401ntsadd.pdf [file bj4660401ntsadd.pdf]
